# Supplementary material for: Fusing a machine learning strategy with density functional theory to hasten the discovery of 2D MXene-based catalysts for hydrogen generation
Source: Royal Society of Chemistry journal article supplement (doi:10.1039/d3ta00344b), 2023-01-01
Supplement: d3ta00344b1.pdf [file d3ta00344b1.pdf]

## Supplementary Information

### **Fusing machine learning strategy with density functional theory to hasten the discovery of 2D MXene based catalysts for hydrogen generation**

B. Moses Abraham<sup>1†</sup>, Priyanka Sinha<sup>1†</sup>, Prosun Halder<sup>1</sup> and Jayant K. Singh<sup>1,2\*</sup>

<sup>1</sup>Department of Chemical Engineering, Indian Institute of Technology Kanpur, Kanpur, 208016, India.

<sup>2</sup>Prescience Insilico Private Limited, Bangalore, 560049, India.

\*E-mail: [jayantks@iitk.ac.in](mailto:jayantks@iitk.ac.in)

†Equal contribution

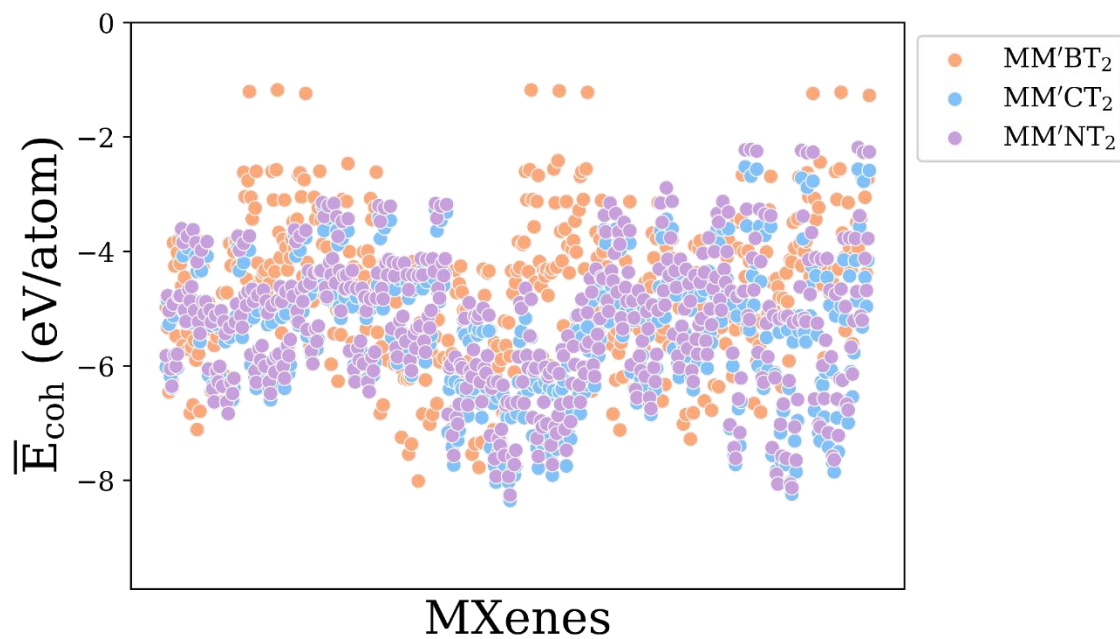

(a)

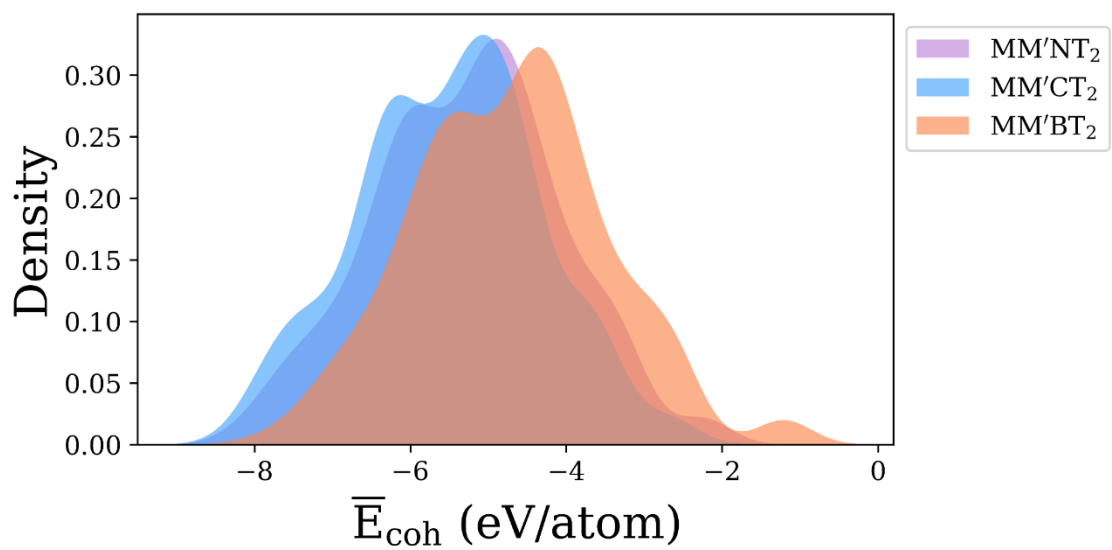

(b)

**Figure S1:** (a) Computed normalized cohesive energies  $\bar{E}_{\text{coh}}$  (eV/atom) and (b) corresponding distribution for the randomly selected 1,125 MM'XT<sub>2</sub>-type MXenes with respect to different X-layers (X = B, C or N).

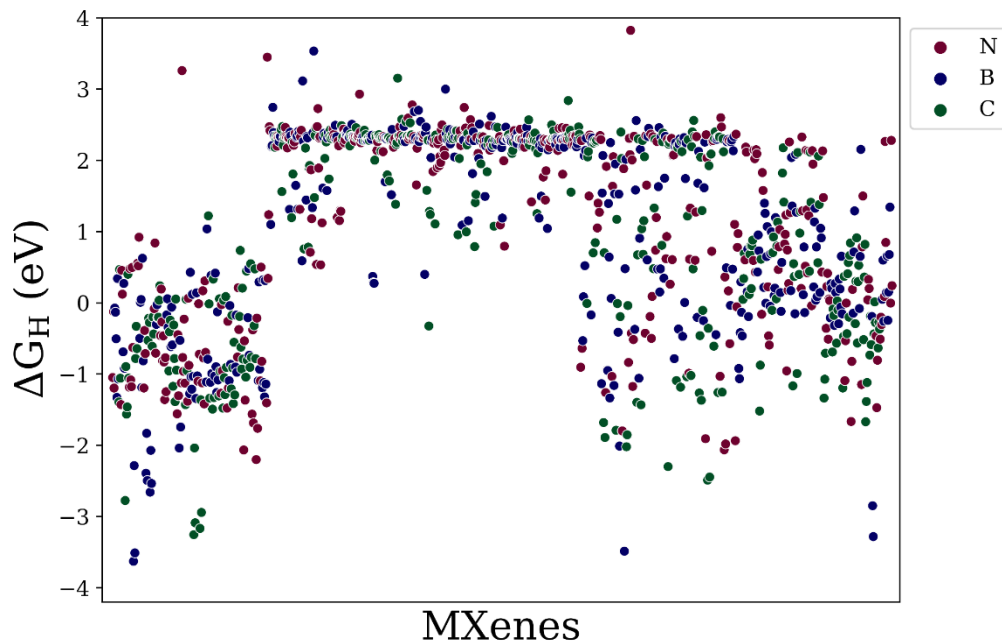

(a)

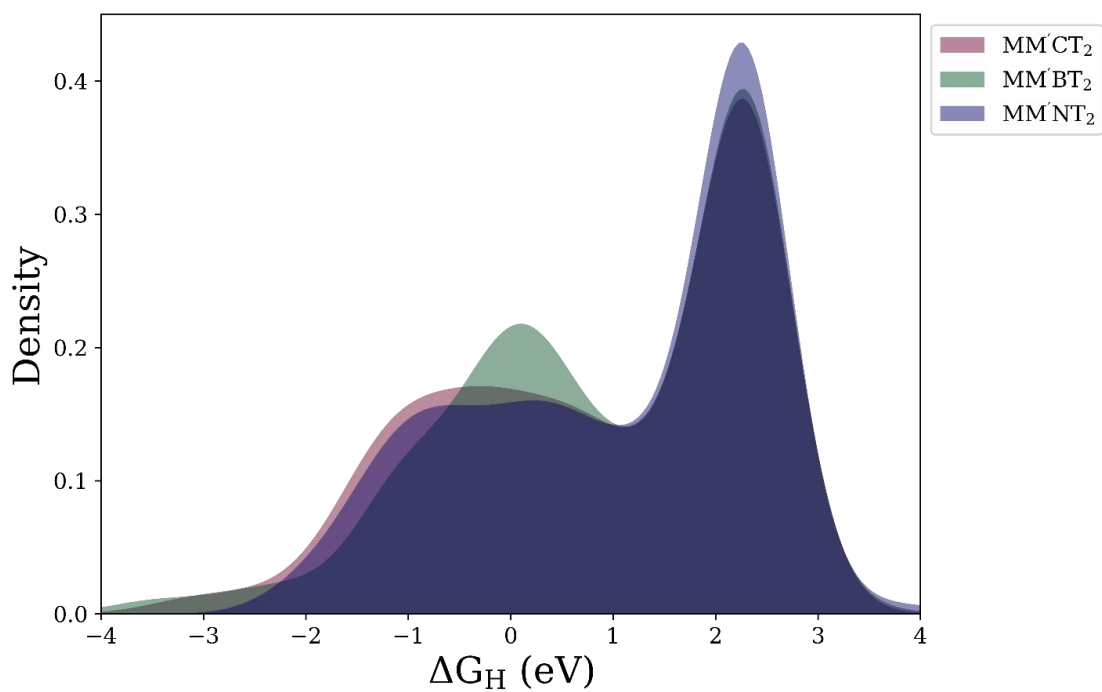

(b)

**Figure S2:** (a) DFT computed hydrogen adsorbed Gibbs free energies ( $\Delta G_H$ ) for randomly selected 1,125 MM'XT<sub>2</sub>-type MXenes and (b) their distribution with respect to different X-layers (X = B, C or N)

**Table S1:** List of primary features, including atomistic, structural and electronic indicators.

| <b>SYMBOL</b>               | <b>ATOMISTIC FEATURES</b>  |
|-----------------------------|----------------------------|
| $W_X, W_M, W_{M'}, W_T$     | Atomic weight              |
| $N_X, N_M, N_{M'}, N_T$     | Atomic number              |
| $P_X, P_M, P_{M'}, P_T$     | Period number              |
| $G_X, G_M, G_{M'}, G_T$     | Group number               |
| $V_X, V_M, V_{M'}, V_T$     | Valence electron           |
| $IE_X, IE_M, IE_{M'}, IE_T$ | First ionization potential |
| $r_M, r_{M'}, r_T$          | Radius                     |
| $EA_M, EA_{M'}, EA_T$       | Electron affinity          |
| $MP_M, MP_{M'}, MP_T$       | Melting point              |
| $BP_M, BP_{M'}, BP_T$       | Boiling point              |
| $\chi_M, \chi_{M'}$         | Electronegativity          |
| $X$                         | X-atom type                |
| $T$                         | Termination type           |

| <b>SYMBOL</b>           | <b>STRUCTURAL FEATURES</b>                |
|-------------------------|-------------------------------------------|
| $W_{sur}, W$            | Surface weight, normalized surface weight |
| $A_{sur}$               | Surface area                              |
| $\rho_{sur}$            | Surface density                           |
| $IE_D = IE_M - IE_{M'}$ | First ionization potential difference     |

| <b>SYMBOL</b>                         | <b>ELECTRONIC FEATURES</b>                  |
|---------------------------------------|---------------------------------------------|
| $LT$                                  | Layer thickness                             |
| $E_{coh}, \bar{E}_{coh}$              | Cohesive energy, normalized cohesive energy |
| $l_{M-T}, l_{M'-T}, l_{M-X}, l_{M-X}$ | Bond lengths                                |

|                                                    |                                |
|----------------------------------------------------|--------------------------------|
| $d_{M-M}, d_{M-M'}, d_{T-T}, d_{T_1-T_2}, d_{X-X}$ | Distances (nearest)            |
| $d_{NN}$                                           | Distance b/w nearest neighbors |
| $dbc$                                              | d-band center                  |
| $WF$                                               | Work function                  |

**Table S2:** Statistical functions for each of the  $\gamma$  properties that are used to expand the primary features.

| <b>FEATURE</b>      | <b>DESCRIPTION</b>                         | <b>FORMULA</b>                                              |
|---------------------|--------------------------------------------|-------------------------------------------------------------|
| $\bar{\gamma}$      | Average value                              | $\sum_{i=0}^n \gamma_i / N$                                 |
| $\tilde{\gamma}$    | Average weighted value                     | $\sum_{i=0}^n \gamma_i n_i / N$                             |
| $\gamma_{max}$      | Maximum value                              | $Max(\gamma_i)$                                             |
| $\gamma_{min}$      | Minimum value                              | $Min(\gamma_i)$                                             |
| $\gamma_{\sigma}$   | Standard deviation with respect to average | $\sqrt{\sum_{i=0}^n \frac{(\bar{\gamma} - \gamma_i)^2}{N}}$ |
| $\gamma_{\sigma^2}$ | Variance with respect to average           | $\sum_{i=0}^n \frac{(\bar{\gamma} - \gamma_i)^2}{N}$        |
| $\gamma^2$          | Squared value                              | $\gamma_i^2$                                                |

**Table S3:** Machine learning models and their description.

| <b>ABBREVIATION</b> | <b>MODEL</b>                | <b>TYPE</b>         | <b>DESCRIPTION</b>                                             |
|---------------------|-----------------------------|---------------------|----------------------------------------------------------------|
| <b>ABR</b>          | AdaBoost Regressor          | Ensemble            | ‘Adaptive Boosting’, fits a sequence of weak learning models   |
| <b>GBR</b>          | Gradient Boosting Regressor | Ensemble            | Builds additive model in forward stage-fashion                 |
| <b>KNR</b>          | K Neighbors Regressor       | Neighbors           | Based on K-nearest neighbors                                   |
| <b>KRR</b>          | Kernel Ridge                | Kernel Ridge        | Combines ridge (L2) penalty with kernel trick                  |
| <b>LAS</b>          | Lasso                       | Linear              | Trained with L1 penalty                                        |
| <b>RDG</b>          | Ridge Regression            | Linear Model        | Trained with L2 penalty                                        |
| <b>RFR</b>          | Random Forest Regressor     | Ensemble            | Meta estimator fitting a number of classifying decision trees  |
| <b>PLS</b>          | Partial Least Squares       | Cross Decomposition | Regularized linear regression, similar to Lasso                |
| <b>ENR</b>          | Elastic Net Regressor       | Linear              | Uses penalties from both lasso (L1) and ridge (L2) regressions |

**Table S4:** Mean absolute error (MAE) and coefficient of determination ( $R^2$ ) after cross-validation for various feature subsets of nine different models.

| <b>MODEL</b> | <b>FEATURE SUBSET</b> | <b>MAE</b>        | <b><math>R^2</math></b> |
|--------------|-----------------------|-------------------|-------------------------|
| <b>ABR</b>   | 1                     | $0.635 \pm 0.055$ | $0.672 \pm 0.092$       |
|              | 2                     | $0.724 \pm 0.074$ | $0.558 \pm 0.096$       |
|              | 3                     | $0.709 \pm 0.079$ | $0.657 \pm 0.117$       |
|              | 1 + 2                 | $0.698 \pm 0.063$ | $0.561 \pm 0.066$       |
|              | 1 + 3                 | $0.597 \pm 0.055$ | $0.711 \pm 0.101$       |
|              | 2 + 3                 | $0.602 \pm 0.092$ | $0.727 \pm 0.057$       |
|              | 1 + 2 + 3             | $0.767 \pm 0.027$ | $0.576 \pm 0.034$       |
| <b>GBR</b>   | 1                     | $0.512 \pm 0.105$ | $0.726 \pm 0.154$       |
|              | 2                     | $0.662 \pm 0.071$ | $0.546 \pm 0.069$       |
|              | 3                     | $0.585 \pm 0.123$ | $0.701 \pm 0.068$       |
|              | 1 + 2                 | $0.675 \pm 0.06$  | $0.549 \pm 0.086$       |
|              | 1 + 3                 | $0.472 \pm 0.052$ | $0.772 \pm 0.098$       |
|              | 2 + 3                 | $0.514 \pm 0.077$ | $0.776 \pm 0.083$       |
|              | 1 + 2 + 3             | $0.424 \pm 0.05$  | $0.771 \pm 0.066$       |
| <b>KRR</b>   | 1                     | $0.592 \pm 0.076$ | $0.712 \pm 0.13$        |
|              | 2                     | $0.715 \pm 0.043$ | $0.546 \pm 0.068$       |
|              | 3                     | $0.799 \pm 0.144$ | $-1.205 \pm 4.603$      |
|              | 1 + 2                 | $0.666 \pm 0.049$ | $0.589 \pm 0.045$       |



|            |           |                   |                    |
|------------|-----------|-------------------|--------------------|
|            | 1 + 3     | $0.995 \pm 0.39$  | $-0.502 \pm 2.228$ |
|            | 2 + 3     | $0.77 \pm 0.107$  | $0.573 \pm 0.096$  |
|            | 1 + 2 + 3 | $0.696 \pm 0.085$ | $0.18 \pm 0.077$   |
| <b>KNR</b> | 1         | $1.25 \pm 0.126$  | $0.003 \pm 0.161$  |
|            | 2         | $0.812 \pm 0.039$ | $0.401 \pm 0.091$  |
|            | 3         | $1.449 \pm 0.101$ | $-0.247 \pm 0.119$ |
|            | 1 + 2     | $0.921 \pm 0.039$ | $0.239 \pm 0.08$   |
|            | 1 + 3     | $1.453 \pm 0.161$ | $-0.286 \pm 0.212$ |
|            | 2 + 3     | $1.458 \pm 0.135$ | $-0.268 \pm 0.135$ |
|            | 1 + 2 + 3 | $1.319 \pm 0.066$ | $0.191 \pm 0.09$   |
| <b>LAS</b> | 1         | $0.512 \pm 0.105$ | $0.726 \pm 0.154$  |
|            | 2         | $1.017 \pm 0.067$ | $0.294 \pm 0.066$  |
|            | 3         | $1.096 \pm 0.081$ | $0.247 \pm 0.129$  |
|            | 1 + 2     | $0.728 \pm 0.088$ | $-0.541 \pm 0.083$ |
|            | 1 + 3     | $0.787 \pm 0.071$ | $0.546 \pm 0.106$  |
|            | 2 + 3     | $1.062 \pm 0.129$ | $0.291 \pm 0.074$  |
|            | 1 + 2 + 3 | $0.639 \pm 0.047$ | $0.614 \pm 0.068$  |
| <b>RFR</b> | 1         | $0.507 \pm 0.074$ | $0.728 \pm 0.094$  |
|            | 2         | $0.709 \pm 0.068$ | $0.472 \pm 0.102$  |
|            | 3         | $0.571 \pm 0.067$ | $0.724 \pm 0.086$  |
|            | 1 + 2     | $0.714 \pm 0.061$ | $0.459 \pm 0.094$  |

|            |           |                   |                   |
|------------|-----------|-------------------|-------------------|
|            | 1 + 3     | $0.447 \pm 0.085$ | $0.776 \pm 0.09$  |
|            | 2 + 3     | $0.493 \pm 0.108$ | $0.781 \pm 0.061$ |
|            | 1 + 2 + 3 | $0.382 \pm 0.025$ | $0.806 \pm 0.061$ |
| <b>RDG</b> | 1         | $0.586 \pm 0.092$ | $0.711 \pm 0.087$ |
|            | 2         | $0.713 \pm 0.063$ | $0.547 \pm 0.06$  |
|            | 3         | $0.609 \pm 0.053$ | $0.674 \pm 0.155$ |
|            | 1 + 2     | $0.668 \pm 0.061$ | $0.587 \pm 0.052$ |
|            | 1 + 3     | $0.622 \pm 0.117$ | $0.554 \pm 0.46$  |
|            | 2 + 3     | $0.605 \pm 0.099$ | $0.679 \pm 0.075$ |
|            | 1 + 2 + 3 | $0.563 \pm 0.039$ | $0.686 \pm 0.058$ |
| <b>ENR</b> | 1         | $0.693 \pm 0.068$ | $0.633 \pm 0.05$  |
|            | 2         | $0.993 \pm 0.066$ | $0.32 \pm 0.047$  |
|            | 3         | $1.084 \pm 0.089$ | $0.279 \pm 0.087$ |
|            | 1 + 2     | $0.717 \pm 0.034$ | $0.544 \pm 0.043$ |
|            | 1 + 3     | $0.701 \pm 0.084$ | $0.622 \pm 0.095$ |
|            | 2 + 3     | $1.034 \pm 0.087$ | $0.328 \pm 0.109$ |
|            | 1 + 2 + 3 | $0.634 \pm 0.042$ | $0.618 \pm 0.069$ |
| <b>PLS</b> | 1         | $0.582 \pm 0.078$ | $0.714 \pm 0.077$ |
|            | 2         | $0.914 \pm 0.062$ | $0.371 \pm 0.083$ |
|            | 3         | $1.025 \pm 0.071$ | $0.342 \pm 0.087$ |
|            | 1 + 2     | $0.682 \pm 0.071$ | $0.575 \pm 0.054$ |

|  |           |                   |                   |
|--|-----------|-------------------|-------------------|
|  | 1 + 3     | $0.637 \pm 0.063$ | $0.667 \pm 0.127$ |
|  | 2 + 3     | $0.925 \pm 0.064$ | $0.43 \pm 0.113$  |
|  | 1 + 2 + 3 | $0.704 \pm 0.062$ | $0.569 \pm 0.068$ |

Where,

Set 1 = Atomistic Features

Set 2 = Surface Features (Structural + Electronic)

Set 3 = Statistical Features

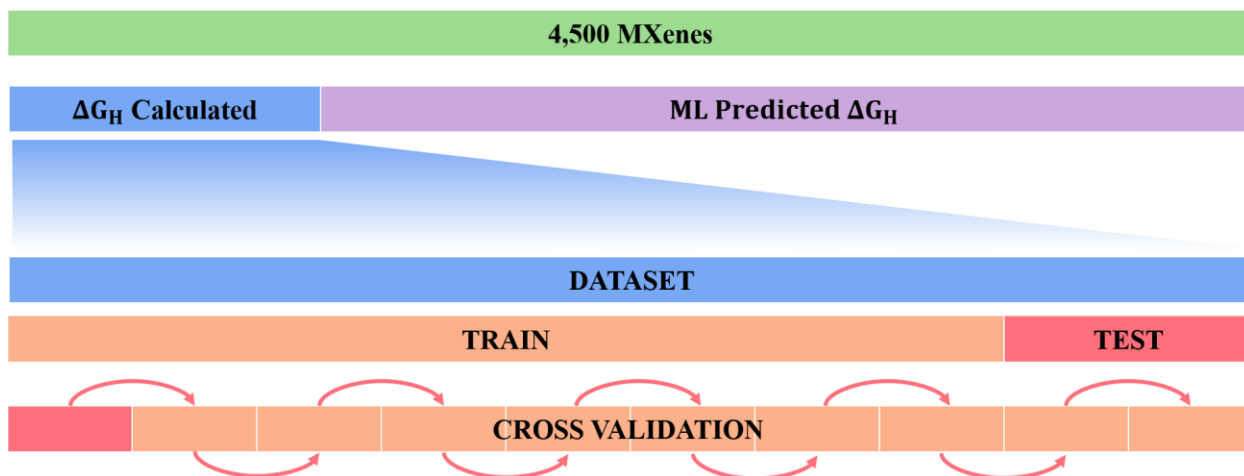

**Figure S3:** Pictorial representation of data distribution for training-testing and cross validation.

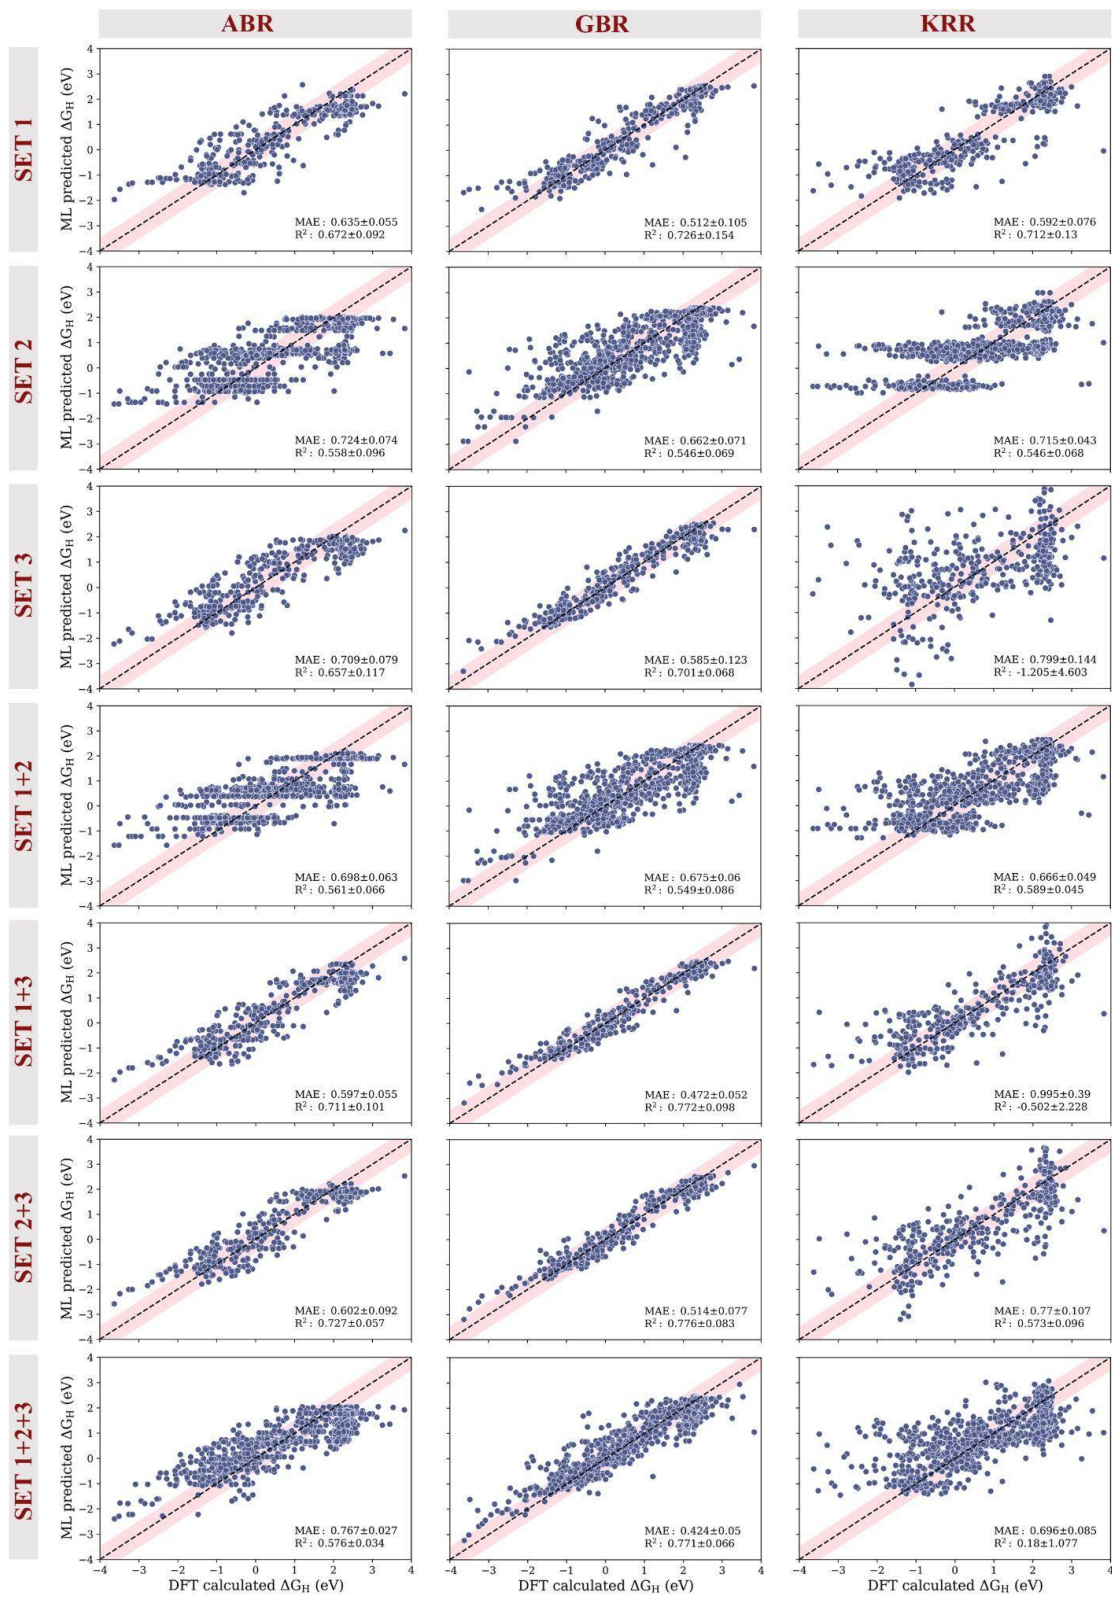

(a)

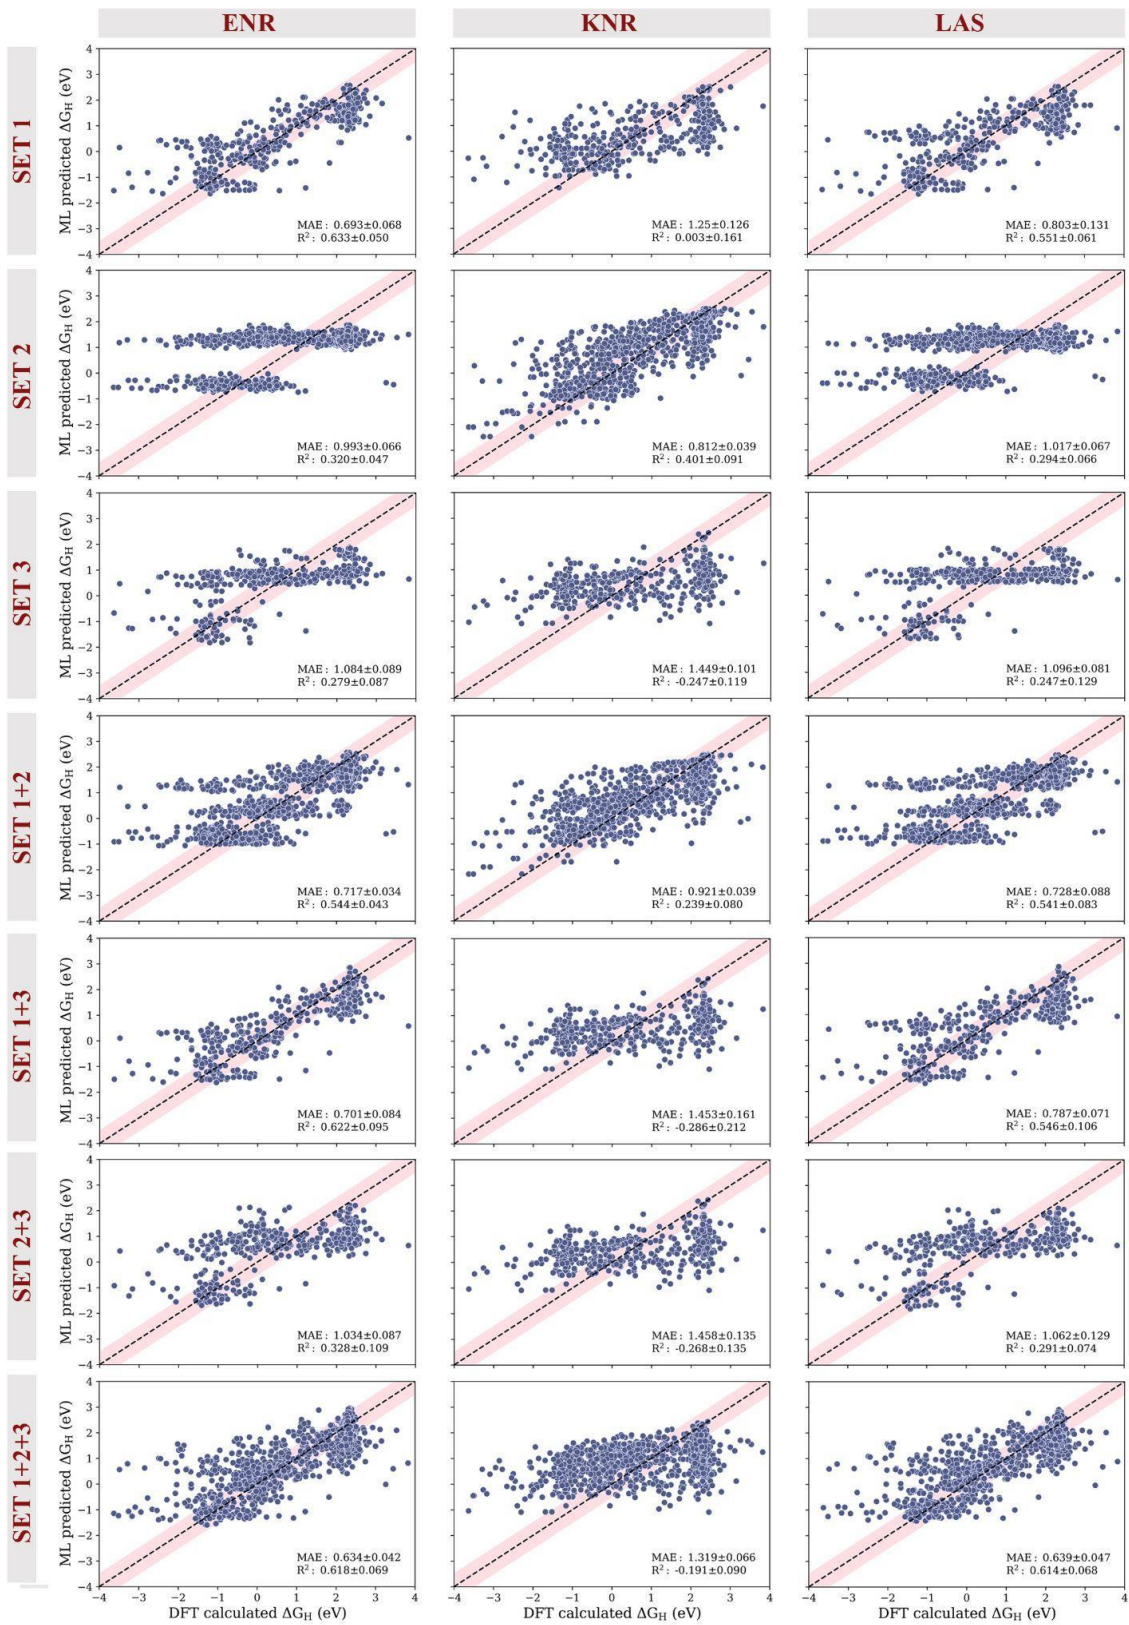

(b)



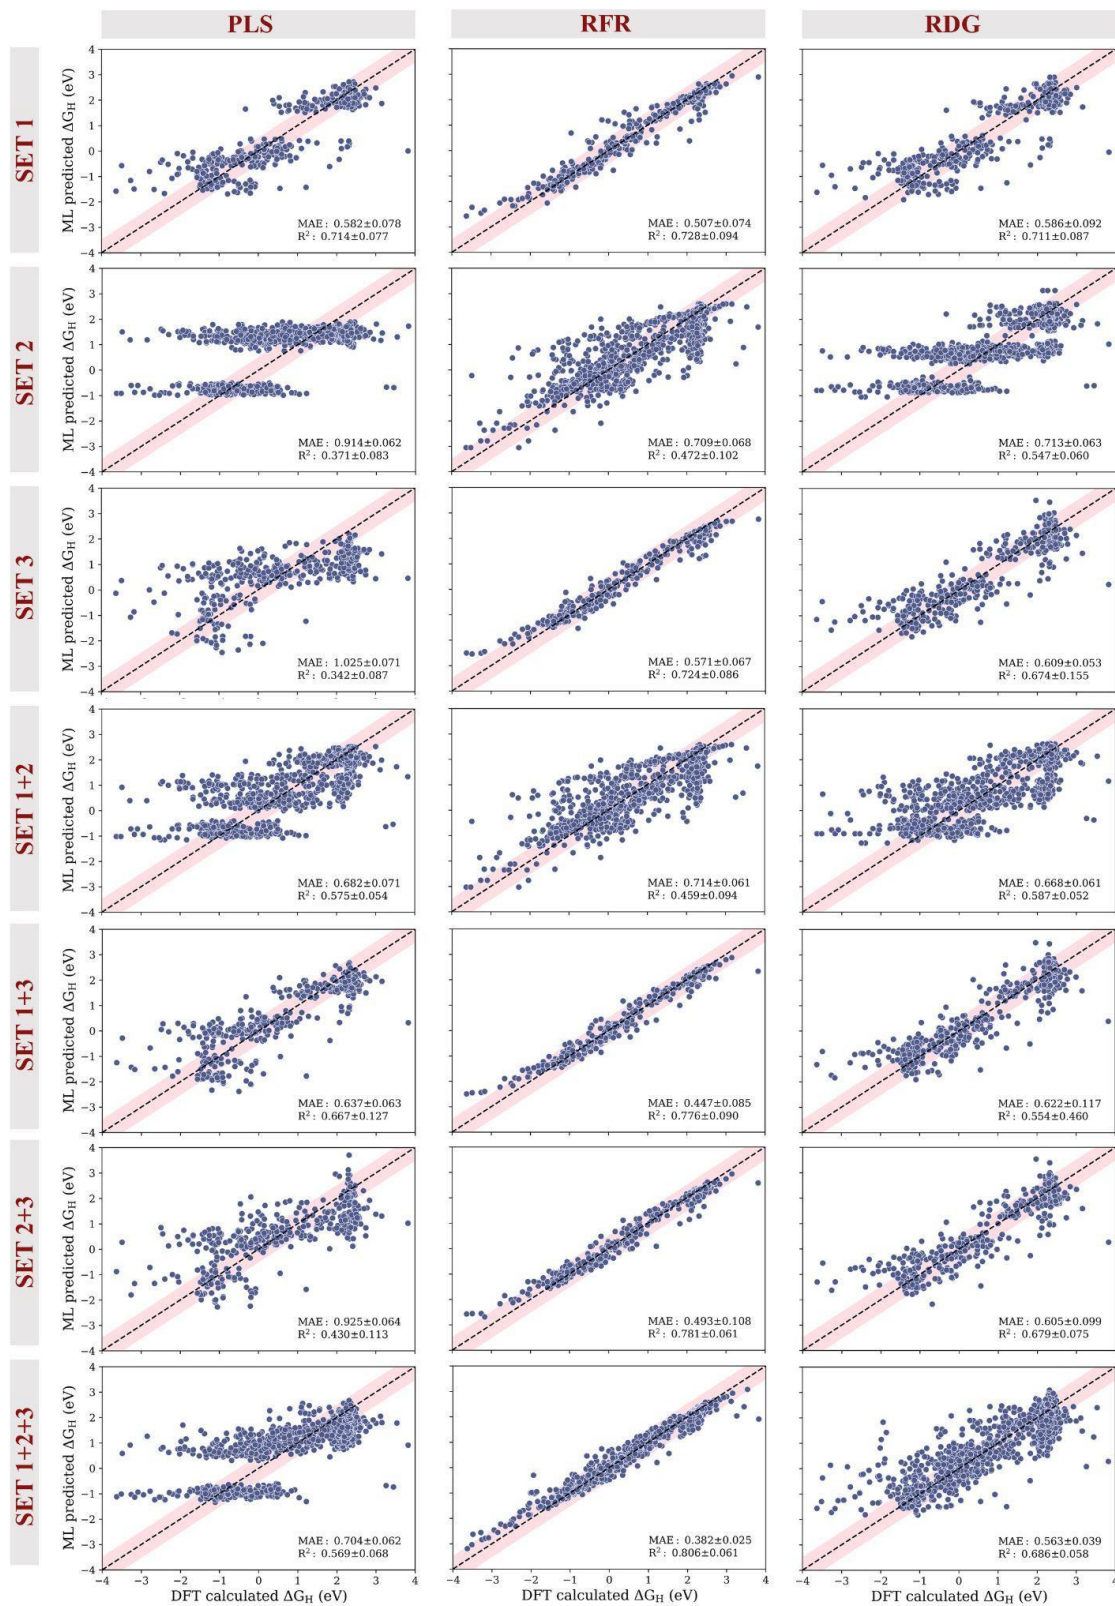

(c)

Figure S4: Parity plots for various sets using different ML models.

**Table S5:** Mean absolute error (MAE) and coefficient of determination ( $R^2$ ) for the training and testing data of set 1 + 2 + 3 using different ML models.

| <b>MODELS</b> | <b>TRAIN MAE</b> | <b>TEST MAE</b> | <b>TRAIN <math>R^2</math></b> | <b>TEST <math>R^2</math></b> |
|---------------|------------------|-----------------|-------------------------------|------------------------------|
| <b>ABR</b>    | 0.666            | 0.702           | 0.701                         | 0.574                        |
| <b>GBR</b>    | 0.294            | 0.421           | 0.913                         | 0.753                        |
| <b>KNR</b>    | 1.083            | 1.342           | 0.215                         | 0.005                        |
| <b>KRR</b>    | 0.707            | 0.625           | 0.561                         | 0.621                        |
| <b>LAS</b>    | 0.647            | 0.578           | 0.619                         | 0.668                        |
| <b>RDG</b>    | 0.52             | 0.568           | 0.746                         | 0.672                        |
| <b>RFR</b>    | 0.144            | 0.388           | 0.973                         | 0.776                        |
| <b>PLS</b>    | 0.717            | 0.647           | 0.576                         | 0.592                        |
| <b>ENR</b>    | 0.642            | 0.573           | 0.629                         | 0.676                        |



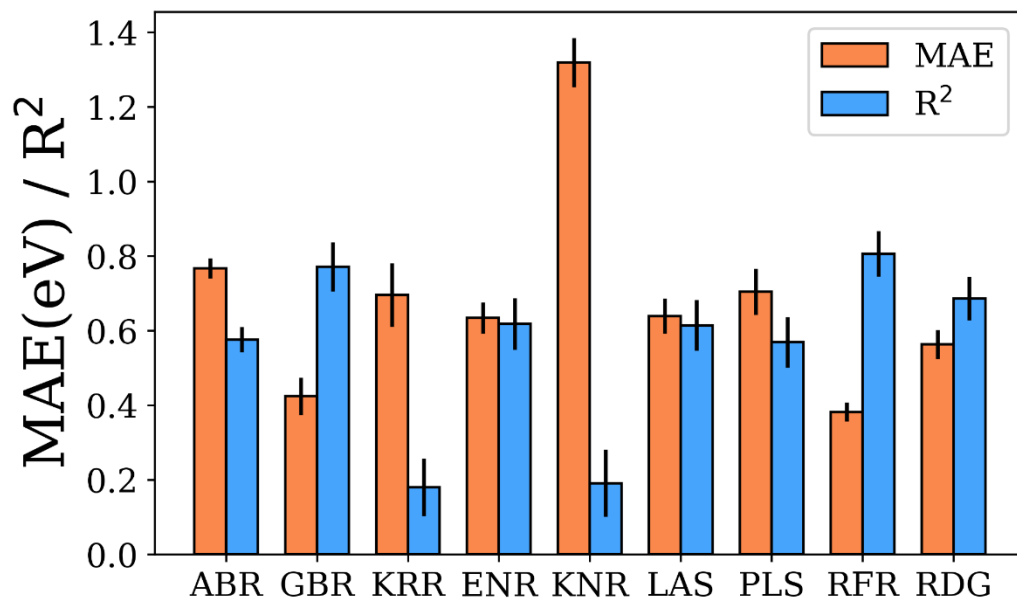

**Figure S5:** Mean absolute error (MAE) and coefficient of determination ( $R^2$ ) after cross-validation for set 1 + 2 + 3 using different ML models.

**Table S6:** List of hyperparameters selected after using randomized search CV.

| <b>METHOD</b>            | <b>HYPERPARAMETERS</b>                                                                                    |
|--------------------------|-----------------------------------------------------------------------------------------------------------|
| <b>Random Forest</b>     | n_estimators = 1000, min_samples_leaf = 2, max_features = 15, max_depth = 500, bootstrap = True           |
| <b>Gradient Boosting</b> | n_estimators = 400, min_samples_leaf = 10, max_features = 'sqrt', max_depth = 1000, learning_rate = 0.015 |

**Table S7:** Feature elimination using recursive feature elimination (RFE), hyperparameter optimization (HO), and leave-one-out (LOO) approach for RFR and GBR models. Here 'K' refers to the number of folds in cross-validation.

| <b>MODEL</b> | <b>APPROACH</b> | <b>K</b> | <b>NO. OF FEATURES</b> | <b>R<sup>2</sup></b> | <b>MAE</b> |
|--------------|-----------------|----------|------------------------|----------------------|------------|
| <b>RFR</b>   | RFE             | 10       | 24                     | 0.817                | 0.374      |
|              | LOO             | 20       | 15                     | 0.820                | 0.367      |
|              | LOO             | 20       | 11                     | 0.778                | 0.418      |
| <b>GBR</b>   | RFE             | 10       | 30                     | 0.814                | 0.371      |
|              | LOO             | 20       | 19                     | 0.826                | 0.358      |
|              | LOO             | 20       | 16                     | 0.466                | 0.723      |

**Table S8:** Top seven features for GBR model after RFE-HO-LOO parameterization

| <b>SYMBOLS</b>      | <b>FEATURES</b>                                                   |
|---------------------|-------------------------------------------------------------------|
| $V_T$               | Valence electron of termination                                   |
| $dbc_{\sigma^2}$    | d-band center variance with respect to average                    |
| $EA_T$              | Electron affinity of termination                                  |
| $BP_T$              | Boiling point of termination                                      |
| $(EA_T)_{\sigma^2}$ | Electron affinity of termination variance with respect to average |
| $MP_T$              | Melting point of termination                                      |
| $IE_T$              | Ionization enthalpy of termination                                |

**Table S9:** Top seven features for RFR model after RFE-HO-LOO parameterization

| <b>SYMBOLS</b>      | <b>FEATURES</b>                                                   |
|---------------------|-------------------------------------------------------------------|
| $V_T$               | Valence electron of termination                                   |
| $BP_T$              | Boiling point of termination                                      |
| $MP_T$              | Melting point of termination                                      |
| $dbc_{\sigma}$      | d-band center standard deviation with respect to average          |
| $LT$                | Layer thickness                                                   |
| $(EA_T)_{\sigma^2}$ | Electron affinity of termination variance with respect to average |
| $d_{M-M'}$          | Distance between inner metal and outer metal                      |

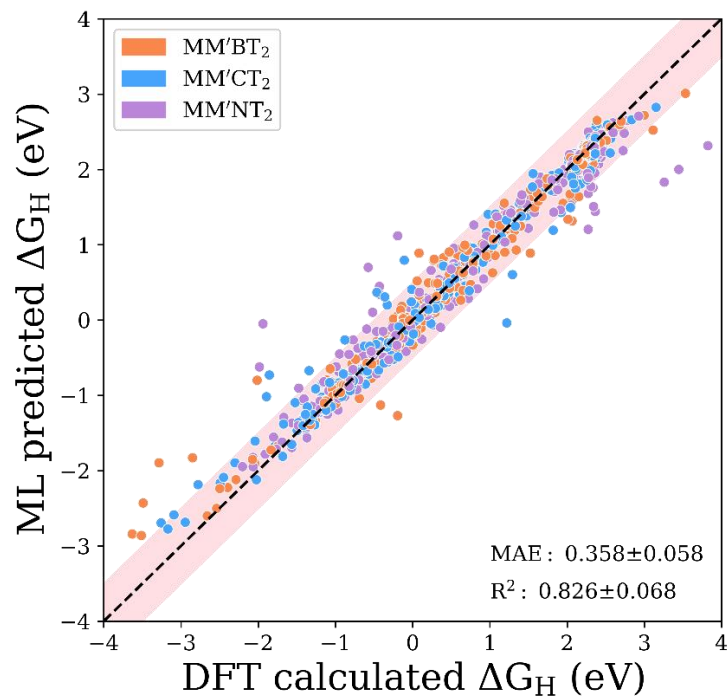

(a)

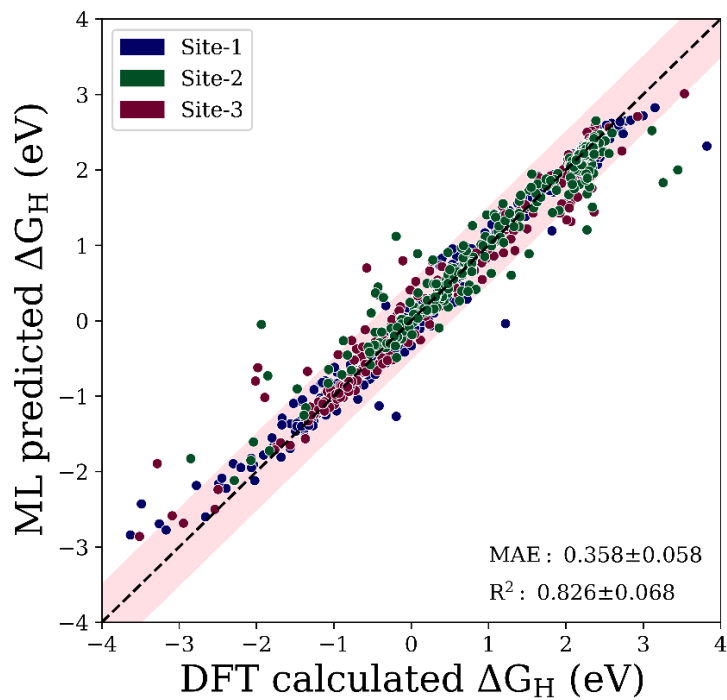

(b)

**Figure S6:** Parity plots of GBR model after RFE-HO-LOO approach with respect to (a) X-layer ( $X = B, C, N$ ) and (b) adsorption sites. The pink-shaded region indicates a deviation of up to 0.5 eV.

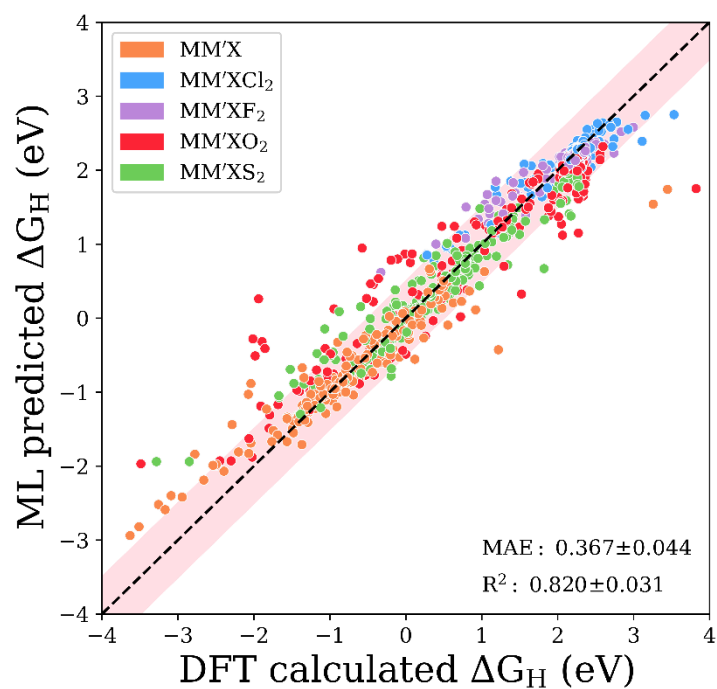

**Figure S7:** Parity plots of RFR model after RFE-HO-LOO approach with respect to terminations. The pink-shaded region indicates a deviation of up to 0.5 eV.

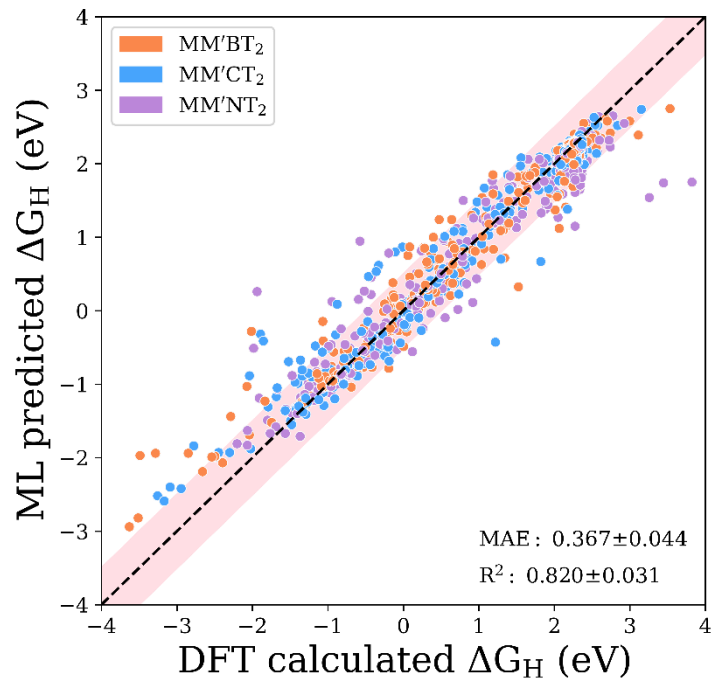

(a)

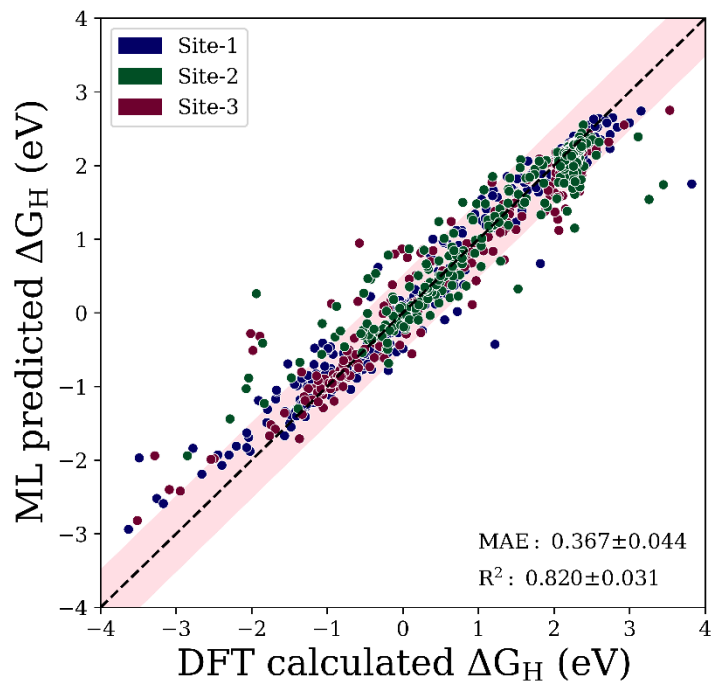

(b)

**Figure S8:** Parity plots of RFR model after RFE-HO-LOO approach with respect to (a) X-layers ( $X = B, C$  or  $N$ ) and (b) adsorption sites. The pink-shaded region indicates a deviation of up to 0.5 eV.

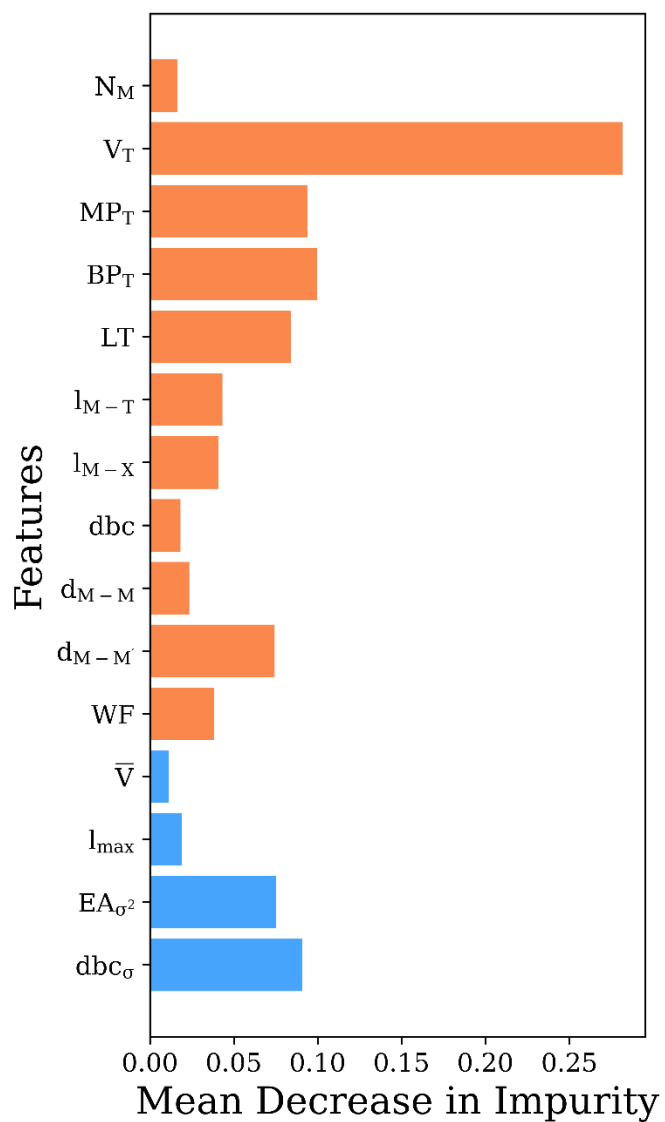

**Figure S9:** Feature importance using mean decrease in impurity on the RFR model after RFE-HO-LOO parameterization that were evaluated via 20-fold cross-validation. Orange and blue colors indicate primary and statistical features, respectively.

**Table S10:** Top 30 MM'XT<sub>2</sub>-type MXenes with better stability and high HER activity predicted using GBR Model after RFE-HO-LOO parameterization.

| <b>MXENES</b>          | $\bar{E}_{coh}$ | <b>ML PREDICTED <math>\Delta G_H</math></b> |
|------------------------|-----------------|---------------------------------------------|
| CrNbNO <sub>2</sub> -1 | -7.729          | -0.063                                      |
| MnNbNO <sub>2</sub> -1 | -6.901          | -0.097                                      |
| NbMoBO <sub>2</sub> -1 | -7.539          | -0.087                                      |
| NbMoCO <sub>2</sub> -1 | -7.931          | -0.048                                      |
| NbVCO <sub>2</sub> -1  | -7.722          | 0.056                                       |
| TiNbBO <sub>2</sub> -1 | -7.117          | 0.046                                       |
| YMoNO <sub>2</sub> -1  | -7.389          | -0.083                                      |
| CrMoBO <sub>2</sub> -3 | -6.824          | -0.058                                      |
| CrVNO <sub>2</sub> -3  | -7.297          | 0.084                                       |
| CrYNO <sub>2</sub> -3  | -7.123          | 0.021                                       |
| MoCrC-2                | -7.426          | -0.050                                      |
| MoCrN-2                | -7.559          | 0.002                                       |
| MoNbC-2                | -8.066          | 0.097                                       |
| MoNbNO <sub>2</sub> -2 | -8.030          | 0.084                                       |
| NbCrB-2                | -6.791          | -0.078                                      |
| NbCrC-2                | -7.614          | 0.007                                       |
| NbTiC-2                | -7.063          | 0.061                                       |
| NbTiN-2                | -7.309          | 0.015                                       |
| NbYN-2                 | -6.957          | 0.017                                       |
| TiCrN-2                | -6.780          | -0.098                                      |
| TiMoC-2                | -7.019          | 0.062                                       |
| TiMoN-2                | -7.171          | -0.090                                      |
| TiVN-2                 | -6.893          | -0.061                                      |
| VMoB-2                 | -6.849          | 0.088                                       |
| VNbC-2                 | -7.641          | -0.040                                      |
| VYN-2                  | -6.611          | -0.017                                      |
| YCrN-2                 | -6.621          | 0.008                                       |
| YNbC-2                 | -6.769          | 0.022                                       |
| YNbN-2                 | -6.994          | -0.008                                      |
| YYNO <sub>2</sub> -2   | -6.819          | -0.0570                                     |



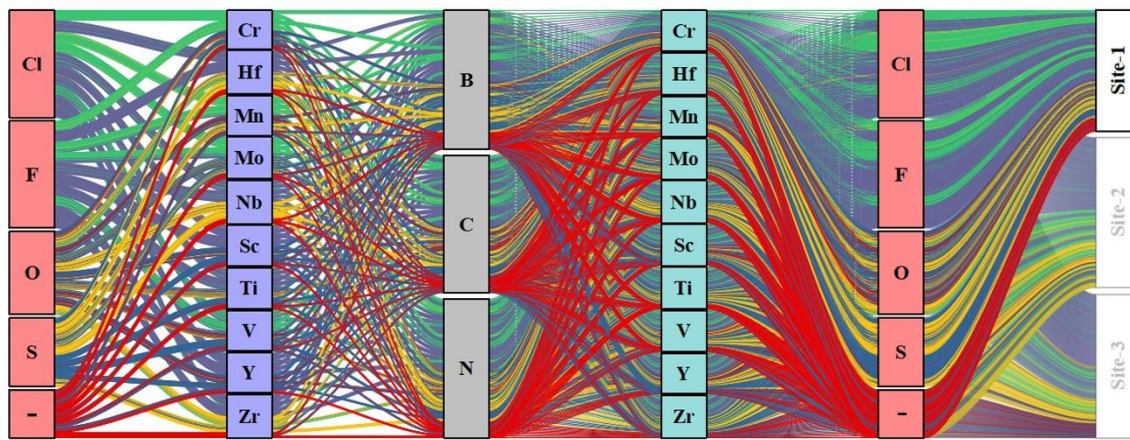

(a)

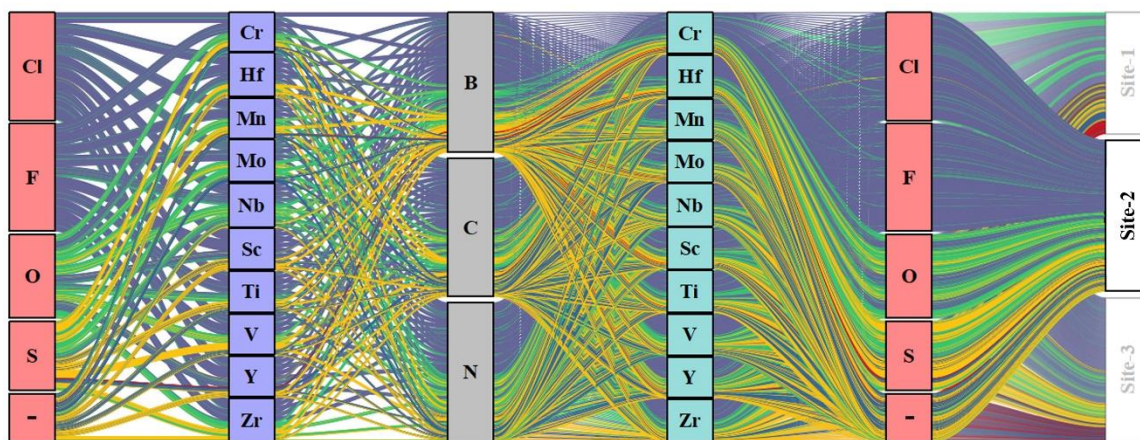

(b)

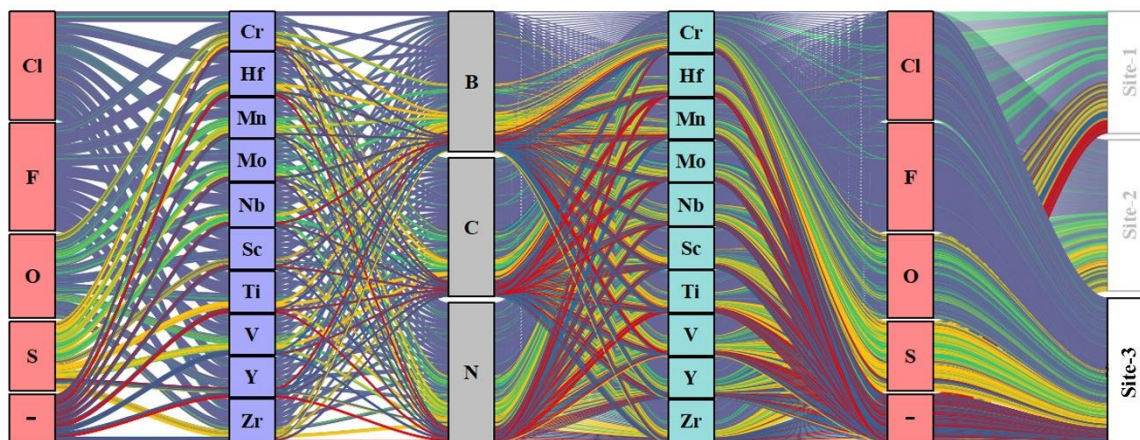

(c)

**Figure S10:** Alluvial Diagram showing (a) Site-1, (b) Site-2, and (c) Site-3 of ML Predicted  $\Delta G_H$  of 4,500 MXenes. Blue, red and yellow color links represent positive, negative and close to zero  $\Delta G_H$  value respectively.
